# Supplementary material for: Compact Targeted Next-Generation Sequencing for Rapid Diagnosis of Drug-Resistant Tuberculosis using Minimum Biocontainment
Source: Research Square preprint supplement (doi:10.21203/rs.3.rs-6940243/v1), 2025-07-30
Supplement: Supplementary file 1 [file d7d308935d6679b7c7e5b6ea.docx]

**Supplementary Fig 1 -** Smear grades of direct sputum samples extracted using Genolyse (a) and Trueprep (b) with their success in tNGS runs


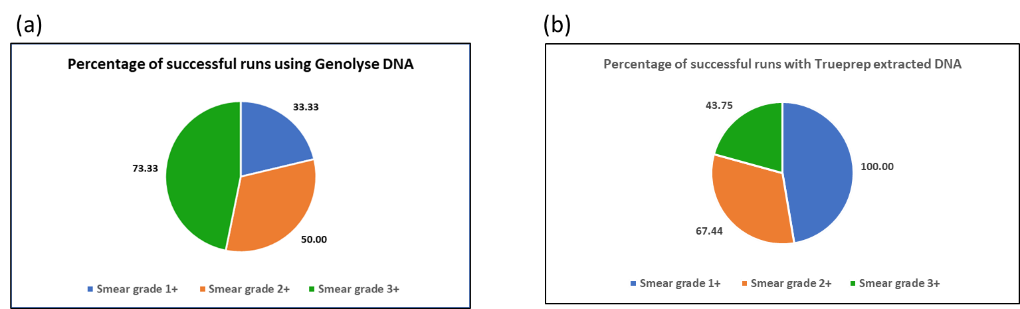


**Supplementary Fig 2 -** Bacillary load of direct sputum samples as estimated by CFUs/ml in Trueprep and their success in tNGS runs

**Supplementary Fig 3 –** Diversity of single nucleotide polymorphisms (SNPs) observed among the first line and second line drugs among samples identified by tNGS in this study. The figure shows the distribution of SNPs among (A) *rpoB* of Rifampicin; (B) *katG, kasA* and *inhA* of isoniazid; (C) *embB* of ethambutol; (D) *pncA* of pyrazinamide; (E) *gyrA* and *gyrB* of fluoroquinolones; (F) *rrs, rrl, rplC*, *gid* and *eis* promoter of aminoglycosides
